# Supplementary material for: Progranulin mediates immune evasion of pancreatic ductal adenocarcinoma through regulation of MHCI expression
Source: PubMed Central journal article supplement (PMC8748938; doi:10.1038/s41467-021-27088-9), 2022-01-10
Supplement: 41467_2021_27088_MOESM1_ESM.pdf [file 41467_2021_27088_MOESM1_ESM.pdf]

# Supplementary Figure 1

## Essen cohort

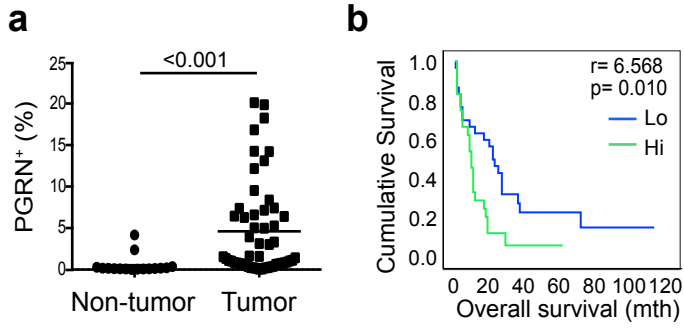

## Nijmegen cohort

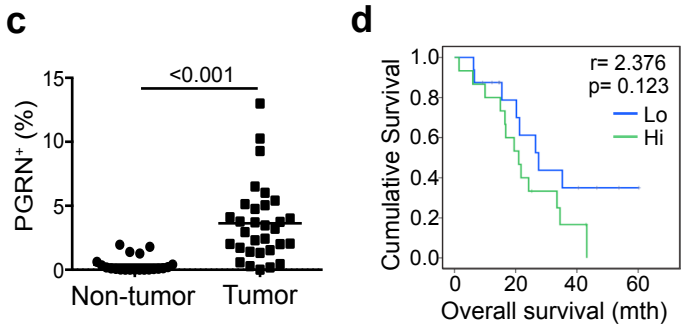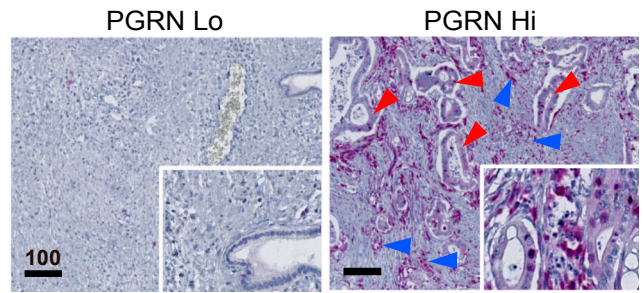

## Maurer *et al* (GSE93326)

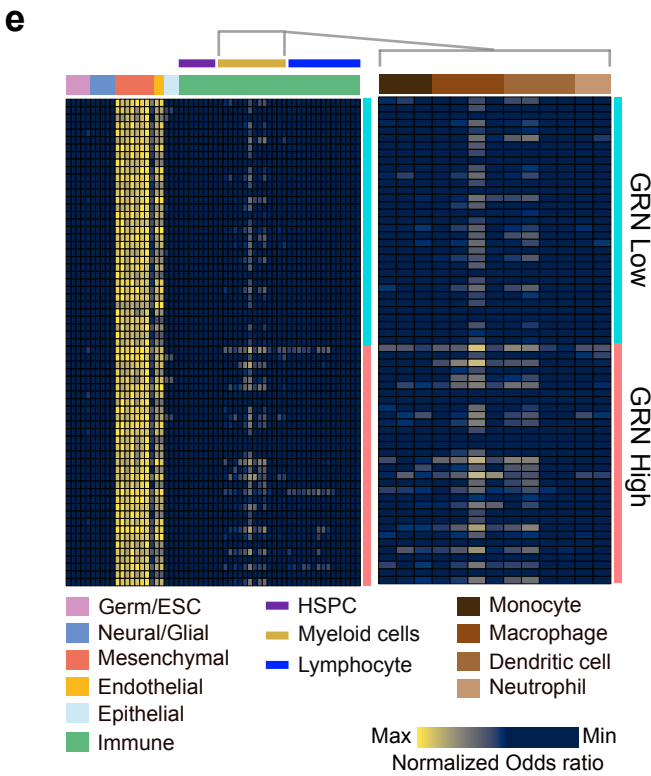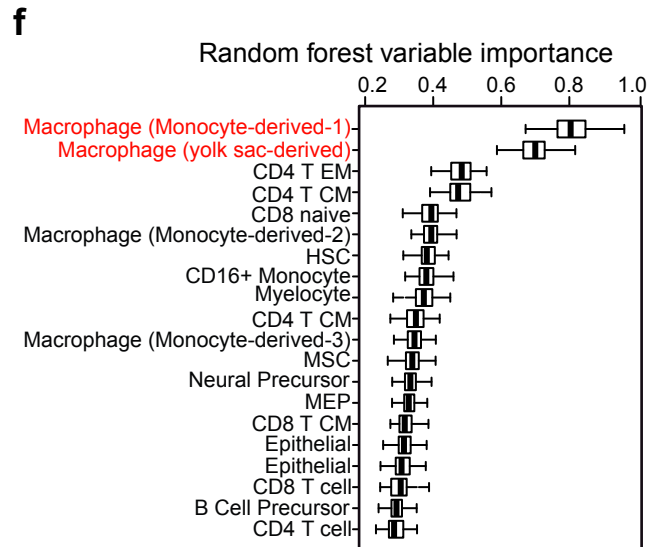

### Supplementary Figure 1

(a,b) Essen cohort. (a) PGRN<sup>+</sup> cells in tumor (n=54) and adjacent non-tumor (n=16) tissues of human PDAC was assessed by IHC staining and quantified by Definiens. Two-tailed Mann-Whitney test. Median  $\pm$  SD is shown. (b) Kaplan-Meier overall survival plot according to PGRN expression level. Patients were segregated into low (n=30) and high (n=24) expression groups with median of number of PGRN<sup>+</sup> cells as cutoff. Log rank test. (c,d) Nijmegen cohort (n=31). (c) PGRN expression levels in tumor (n=31) and adjacent non-tumor (n=21) tissues of human PDAC were assessed by IHC staining and quantified by Definiens. Two-tailed Mann-Whitney test. Median  $\pm$  SD is shown. (d) Kaplan-Meier overall survival plots according to PGRN expression level. Patients (n= 31) were segregated into low (n=16) and high (n=15) expression groups with median of positive cells as cutoff. Log rank test. Right panel shows representative IHC staining of high- and low- PGRN expressing patient specimens. Right panel: PGRN expression in both tumor and stromal compartments of PDAC. Red arrowheads indicate PGRN<sup>+</sup> tumor cells; blue arrowheads indicate PGRN<sup>+</sup> stromal cells. (e,f) Maurer *et al* dataset (GSE93326, n=65). (e) Cell type deconvolution of 43 different cell types of transcriptomes derived from *GRN*-high (n =32) and *GRN*-low (n =32) stroma samples, indicating enrichment of myeloid cells in *GRN*-high stroma. Data represents normalized odds ratios comparing number of enriched cell type-specific genes with random enrichment for each sample (rows) and cell type (columns). HSPC, Hematopoietic stem and progenitor cells. (f) Box plots represent top 20 variable importance computed by 100-fold random forest for each cell type identified in (e), and ordered by descending importance in predicting *GRN* high and low stroma samples. Macrophages represents the cell type showing highest degree of importance in predicting *GRN* high stroma. Boxplots are drawn with boxes representing the interquartile range (IQR), a line across the box indicating the median, and whiskers indicating 1.5 x IQR. Scale bar unit:  $\mu$ m

# Supplementary Figure 2

**a**

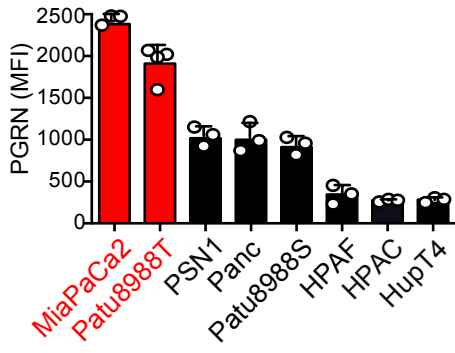

**b**

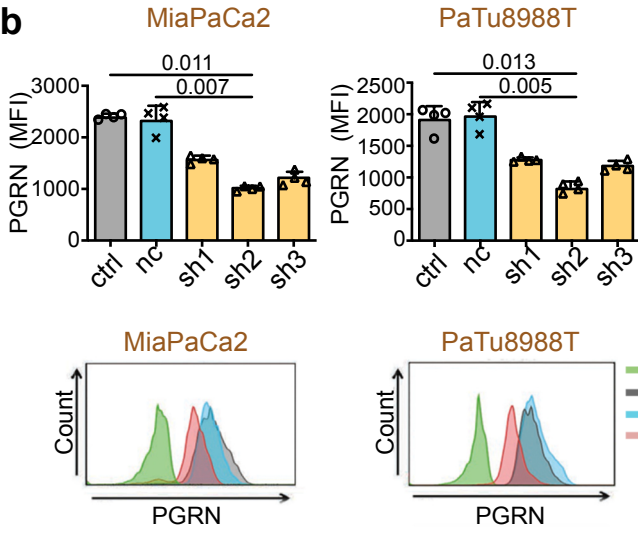

**c**

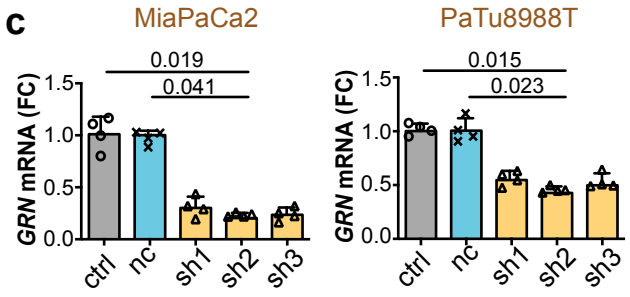

**d**

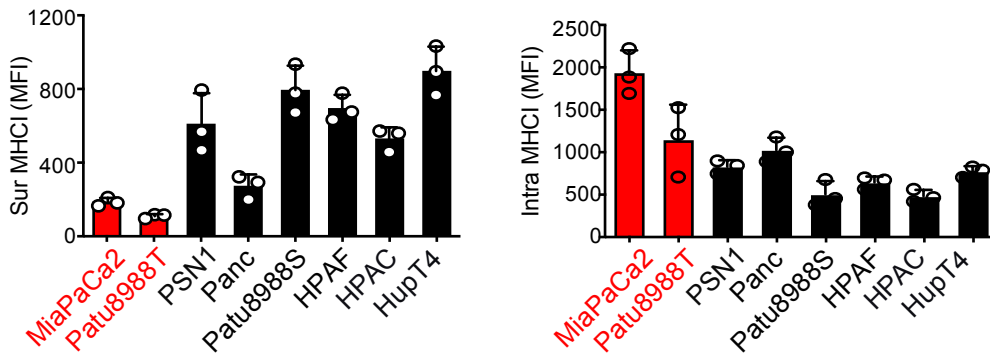

## Supplementary Figure 2

(a) Expression level of intracellular PGRN in human commercial PDAC cell lines was assessed by flow cytometric analysis. PatuT: n=4; All others: n=3 independent experiments. (b,c) *GRN* suppression by shRNA plasmid transfection in PDAC cell lines MiaPaCa2 and Patu8988T. PGRN protein (PGRN) and gene (*GRN*) levels measured by (b) flow cytometry and (c) qRT-PCR, respectively. *GRN* shRNA2 (sh2) consistently demonstrated the highest efficiency of suppression and was therefore selected for subsequent functional evaluation as "shGRN". n=4 independent experiments. One-way ANOVA, Kruskal-Wallis test. (d) Expression level of surface and intracellular MHCI (HLA-A/B/C) in human commercial PDAC cell lines was assessed by flow cytometric analysis. n=3 independent experiments. FC: fold change. ctrl: parental PDAC cells; nc: shRNA scrambled control; sh1-3; *GRN* shRNA1-3. MFI: mean fluorescence intensity. Mean + SD is shown.

# Supplementary Figure 3

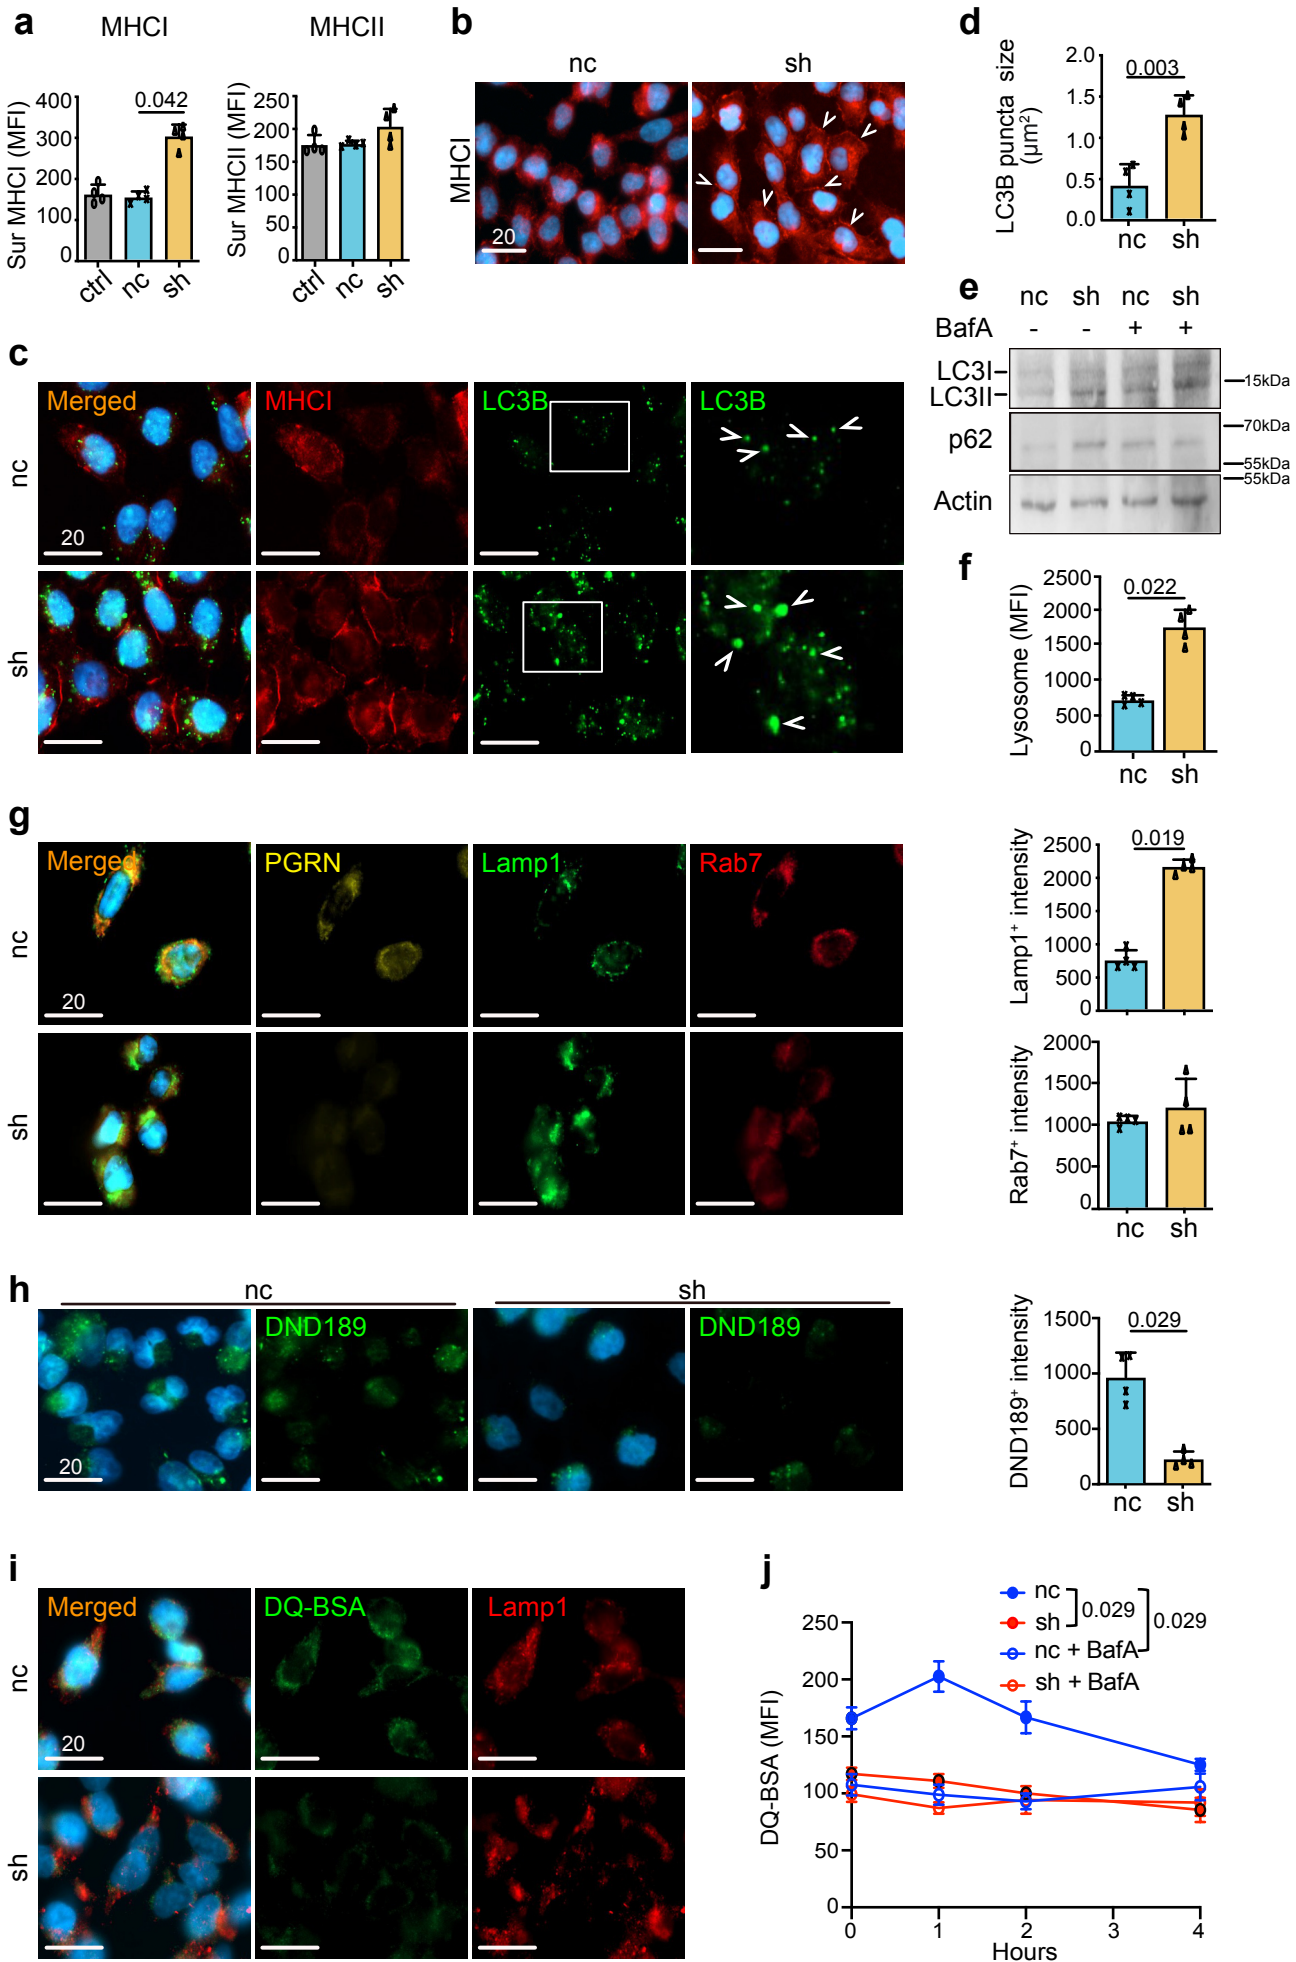

### Supplementary Figure 3

(a) Surface MHC I (HLA-A/B/C) and MHC II (HLA-DR) expression on human PDAC cell line Patu8988T upon *GRN* suppression was assessed by flow cytometry. n=4 independent experiments. One-way ANOVA, Kruskal-Wallis test. MFI: mean fluorescence intensity. (b) IF staining of MHC I marker HLA-A/B/C reveals augmented surface MHC I expression on Patu8988T upon *GRN* suppression. White arrowheads indicate the membraneous staining of MHC I. (n=4 independent experiments). Representative images are shown. (c,d) IF staining of MHC I (red) and LC3B (green) in Patu8988T cells upon *GRN* suppression. (d) Average size of LC3B puncta of 50 cells of each treatment was measured by ZEN software. n=4 independent experiments. Two-tailed Mann-Whitney test. (e) Western blot showing LC3B (LC3I, II), p62/SQSTM1 (p62) and actin of Patu8988T cells upon *GRN* suppression treated with or without V-ATPase inhibitor Bafilomycin A (BafA, 100nM, 24h). (n=4 independent experiments). Representative images are shown. Two-tailed Mann-Whitney test. (f) Lysosome content in Patu8988T upon *GRN* suppression was assessed by staining with Cytopainter LysoGreen indicator and measured by flow cytometry. n=4 independent experiments. Two-tailed Mann-Whitney test. (g) IF staining of PGRN, lysosome marker Lamp1 and late endosome marker Rab7 in Patu8988T upon *GRN* suppression. Right panel: Average intensity of Lamp1 and Rab7 signals per cell was measured by HALO software. n=4 independent experiments. Two-tailed Mann-Whitney test. (h) IF staining of LysoSensor DND-189 in Patu8988T cells upon *GRN* suppression. Right panel: Average intensity of DND189 signal per cell was measured by HALO software. n=4 independent experiments. Two-tailed Mann-Whitney test. (i) IF images showing the dequenched DA-BSA (green) and Lamp1 (red) in Patu8988T cells upon *GRN* suppression. (j) Flow cytometric quantification of the dequenched DQ-BSA signal in Patu8988T cells upon *GRN* suppression, with or without prior treatment with BafA (100nM, 24h), after different chasing time. n=4 independent experiments. Two-tailed Mann-Whitney test. ctrl: parental PDAC cells; nc: shRNA scrambled control; sh; *GRN* shRNA. Mean + or  $\pm$  SD is shown. Scale bar unit:  $\mu$ m

# Supplementary Figure 4

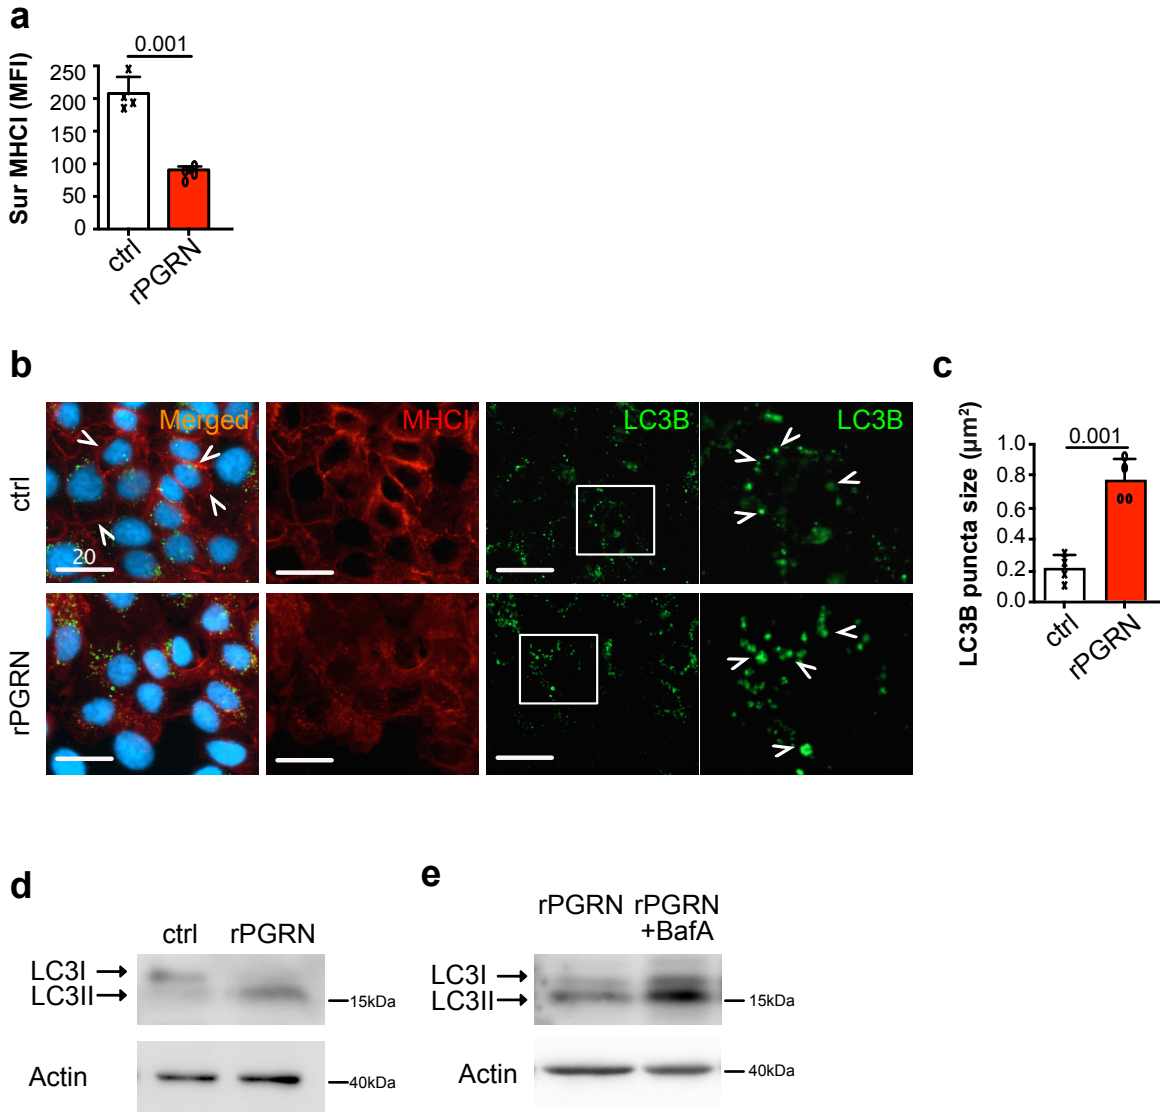

#### Supplementary Figure 4

HupT4 cells were treated with or without 0.4 ng/mL recombinant PGRN (rPGRN) for 1 day. (a) Surface MHC I (HLA-A/B/C) was assessed by flow cytometry.  $n=4$  independent experiments. Two-tailed Mann-Whitney test. (b,c) IF staining of MHC I (red) and LC3B (green) in HupT4 cells upon rPGRN stimulation. White arrows on the left image indicates membranous staining of MHC I; while the arrows on the right image indicates LC3 puncta. ( $n=4$  independent experiments). Representative images are shown. (c) Average size of LC3B puncta of 50 cells of each treatment was measured by ZEN software.  $n=4$  independent experiments. Two-tailed Mann-Whitney test. (d) Western blot showing LC3B-II level of HupT4 cells with or without rPGRN (0.4ng/ml, 24h). ( $n=3$  independent experiments). Representative images are shown. (e) Western blot showing LC3B-II level of HupT4 treated with rPGRN (0.4ng/ml, 24h) with or without co-treatment with BafA (100nM, 24h). ( $n=3$  independent experiments). Representative images are shown. Mean + SD is shown. Scale bar unit:  $\mu\text{m}$



# Supplementary Figure 5

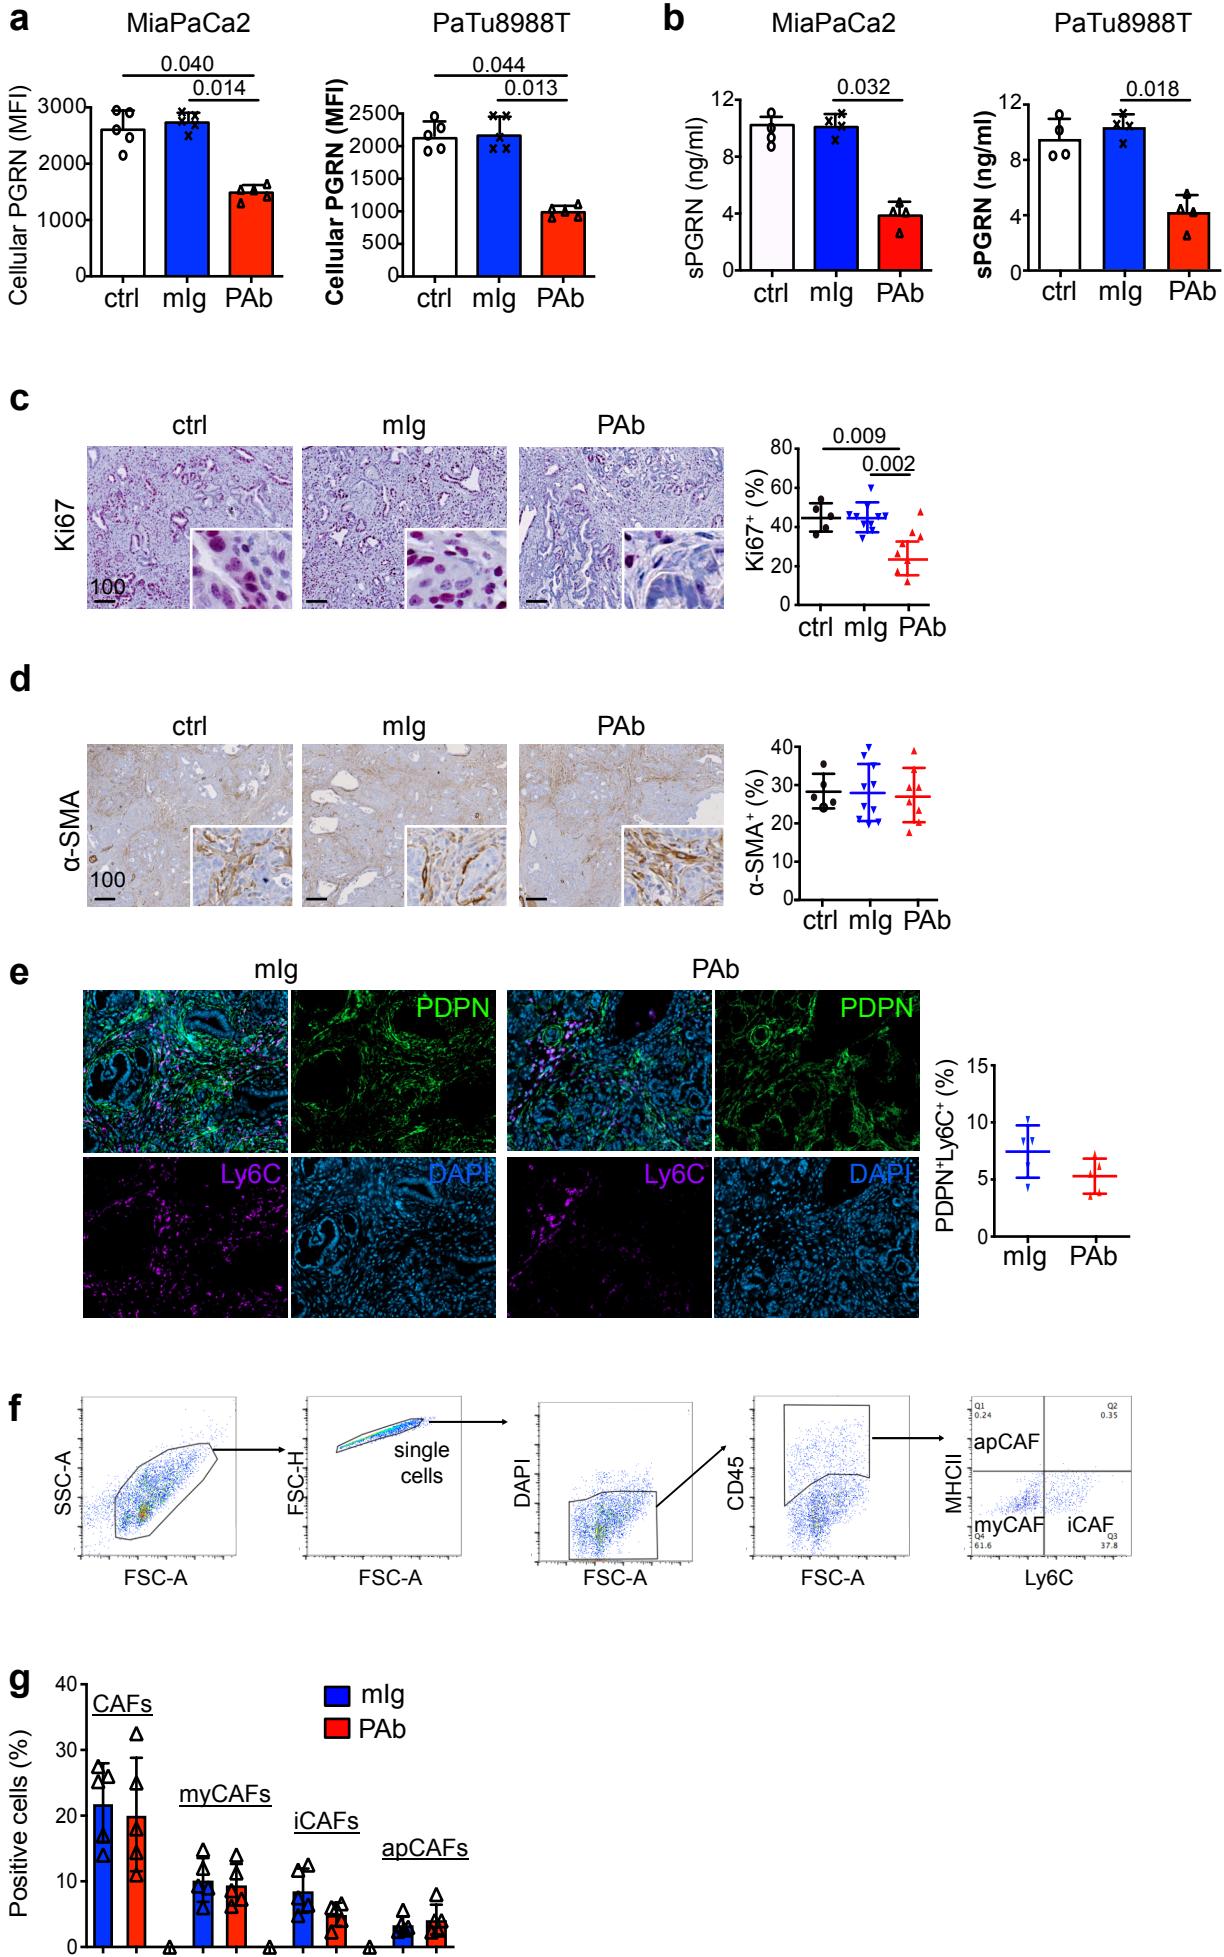

### Supplementary Figure 5

MiaPaCa2 and Patu8988T cells were treated with PGRN Ab (PAb) or mlg (100ug/ml) for 24h. Medium was then changed and cells were cultured for 2 more days. (a) Cellular PGRN level was assessed by flow cytometry (n=5 independent experiments), while (b) soluble PGRN (sPGRN) level was measured by ELISA (n=4 culture supernatants collected from cultured cells in 4 independent experiments). One-way ANOVA, Kruskal-Wallis test. MFI: Mean Fluorescent Intensity. (c,d) IHC staining of (c) Ki67 and (d) myofibroblast marker  $\alpha$ -sma in *CKP* tumors treated with or without PGRN Ab (PAb) or mlg. Right panel shows the percentage of positive cells in the tumors (n=5). ctrl: n=5 animals; mlg: n=10 animals; PGRN Ab (PAb): n=8 animals. One-way ANOVA, Kruskal-Wallis test. (e) mIF staining of PDPN (green) and Ly6C (purple) in *CKP* tumors treated with PGRN Ab or mlg. Right panel shows the percentage of PDPN<sup>+</sup>Ly6C<sup>+</sup> iCAFs in the tumors (n=5 animals). Two-tailed Mann-Whitney test. (f) Gating strategy for flow cytometry analysis on different CAF populations. (g) Flow cytometric analysis on the quantity of PDPN<sup>+</sup> CAFs, PDPN<sup>+</sup>Ly6C<sup>+</sup>MHCII<sup>-</sup> iCAFs, PDPN<sup>+</sup>Ly6C<sup>-</sup>MHCII<sup>-</sup> myCAFs, and PDPN<sup>+</sup>Ly6C<sup>-</sup>MHCII<sup>+</sup> apCAFs in *CKP* tumors treated with PGRN Ab or mlg (50mg/kg) (n=5 animals). Two-tailed Mann-Whitney test. Mean + or  $\pm$  SD is shown.

# Supplementary Figure 6

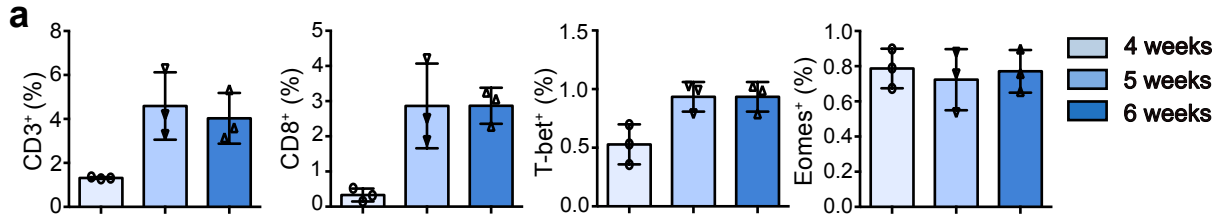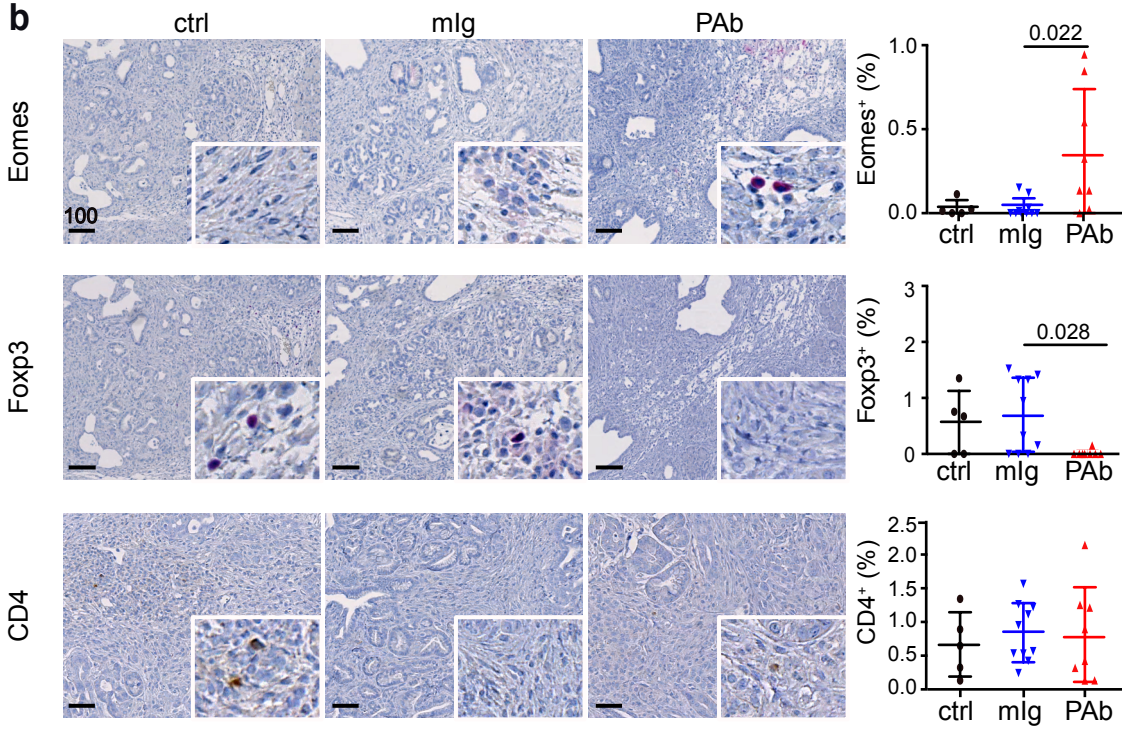

### Supplementary Figure 6

(a) Quantification of T cell markers CD3, CD8, T-bet and Eomes in *CKP* tumors during early PDAC development (n=3 animals from each time point). One-way ANOVA, Kruskal-Wallis test. Mean  $\pm$  SD is shown. (b) IHC of CD4, Eomes and Foxp3 in *CKP* tumors treated with or without PGRN Ab or mlg. ctrl: n=5 animals; mlg: n=10 animals; PGRN Ab (PAb): n=8 animals. The right panel shows the percentage of positive cells in the whole tumorous tissues. ctrl: n=5 animals; mlg: n=10 animals; PGRN Ab: n=8 animals. One-way ANOVA, Kruskal-Wallis test. Mean  $\pm$  SD is shown. Scale bar unit:  $\mu$ m

# Supplementary Figure 7

**a**

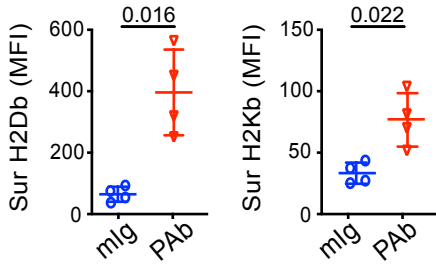

**b**

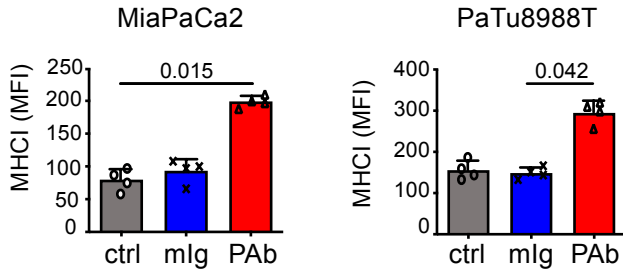

**c**

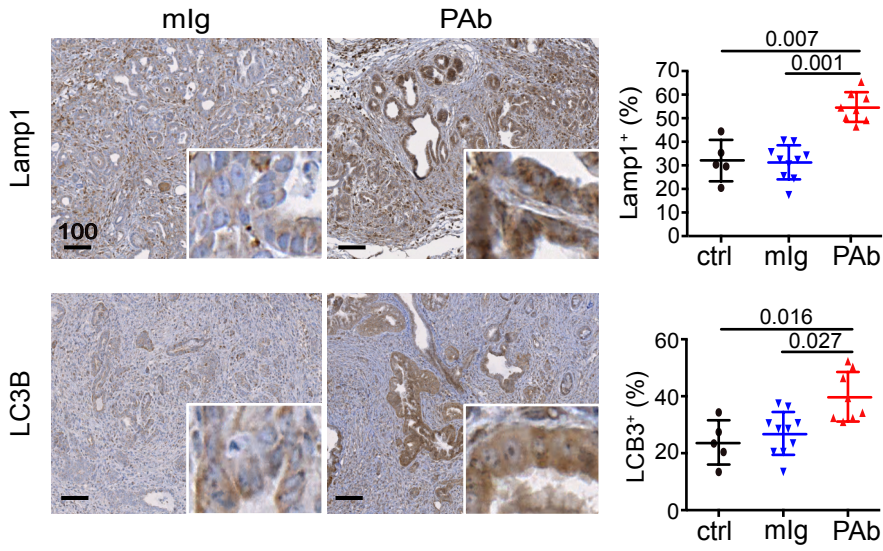

**d**

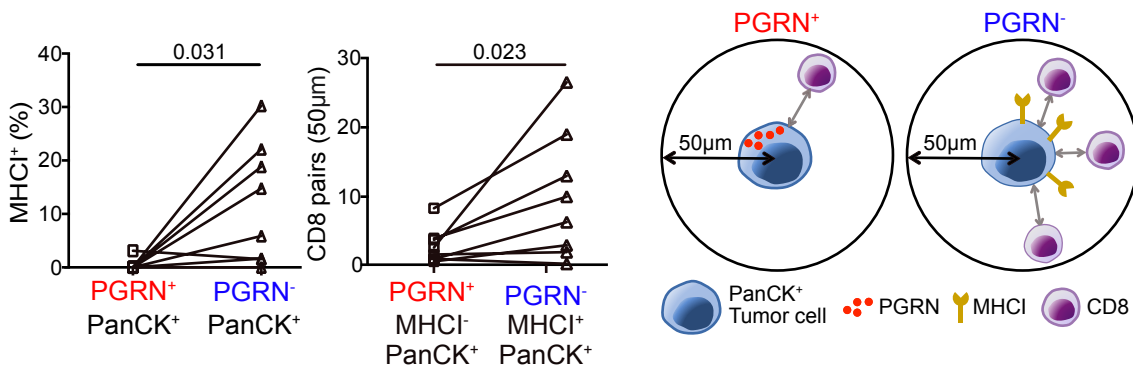

### Supplementary Figure 7

(a) Surface MHC I molecules H-2Db and H-2Kb expression on EpCAM<sup>+</sup> tumor cells freshly dissociated from *CKP* tumors treated with PGRN Ab or mlg (50mg/kg) were assessed by flow cytometry (n=4 animals). Two-tailed Mann-Whitney test. Mean  $\pm$  SD is shown. (b) Surface MHC I (HLA-A/B/C) on human PDAC cell lines MiaPaCa2 and Patu8988T upon treatment with PGRN Ab or mlg (100 ug/ml) was assessed by flow cytometry (n=4 independent experiments). One-way ANOVA, Kruskal-Wallis test. Mean  $\pm$  SD is shown. (c) IHC staining of lysosome marker Lamp1 and autophagosome marker LC3B in *CKP* tumors treated with mlg or PGRN Ab. The right panels show the percentage of Lamp1<sup>+</sup> and LC3B<sup>+</sup> cells in the whole tumorous tissues of *CKP* mice treated with or without PGRN Ab and mlg. ctrl: n=5 animals; mlg: n=10 animals; PGRN Ab (PAb): n=8 animals. One-way ANOVA, Kruskal-Wallis test. Mean  $\pm$  SD is shown. (d) Automated computational analysis showing the percentage of MHC I<sup>+</sup> cells in PGRN<sup>+</sup>PanCK<sup>+</sup> and PGRN<sup>-</sup>PanCK<sup>+</sup> populations (left panel), and the number of CD8<sup>+</sup> cells in proximity (<50 $\mu$ m radical distance) of PGRN<sup>+</sup>MHC I<sup>-</sup> or PGRN<sup>-</sup>MHC I<sup>+</sup> PanCK<sup>+</sup> tumor cells in anti-PGRN Ab-treated *CKP* tumors (n=8 animals) (right panel). Two-tailed Mann-Whitney test. Scheme depicts the differential MHC I expression and interaction of tumor and CD8 cells depending on tumor-expressed PGRN. Scale bar unit:  $\mu$ m

# Supplementary Figure 8

**a**

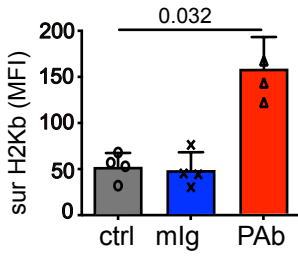

**b**

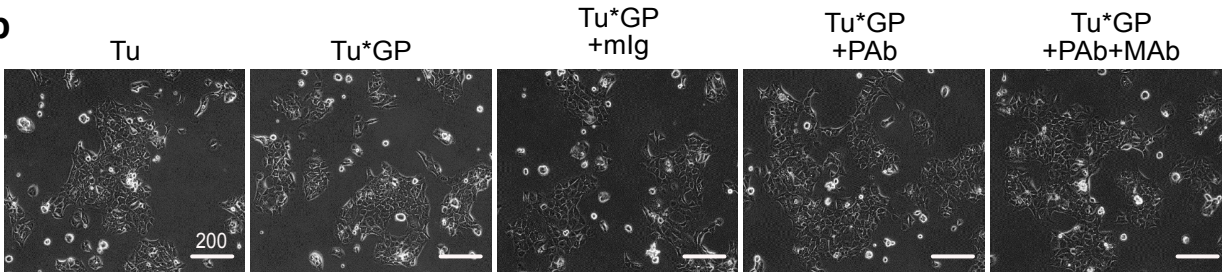

**c**

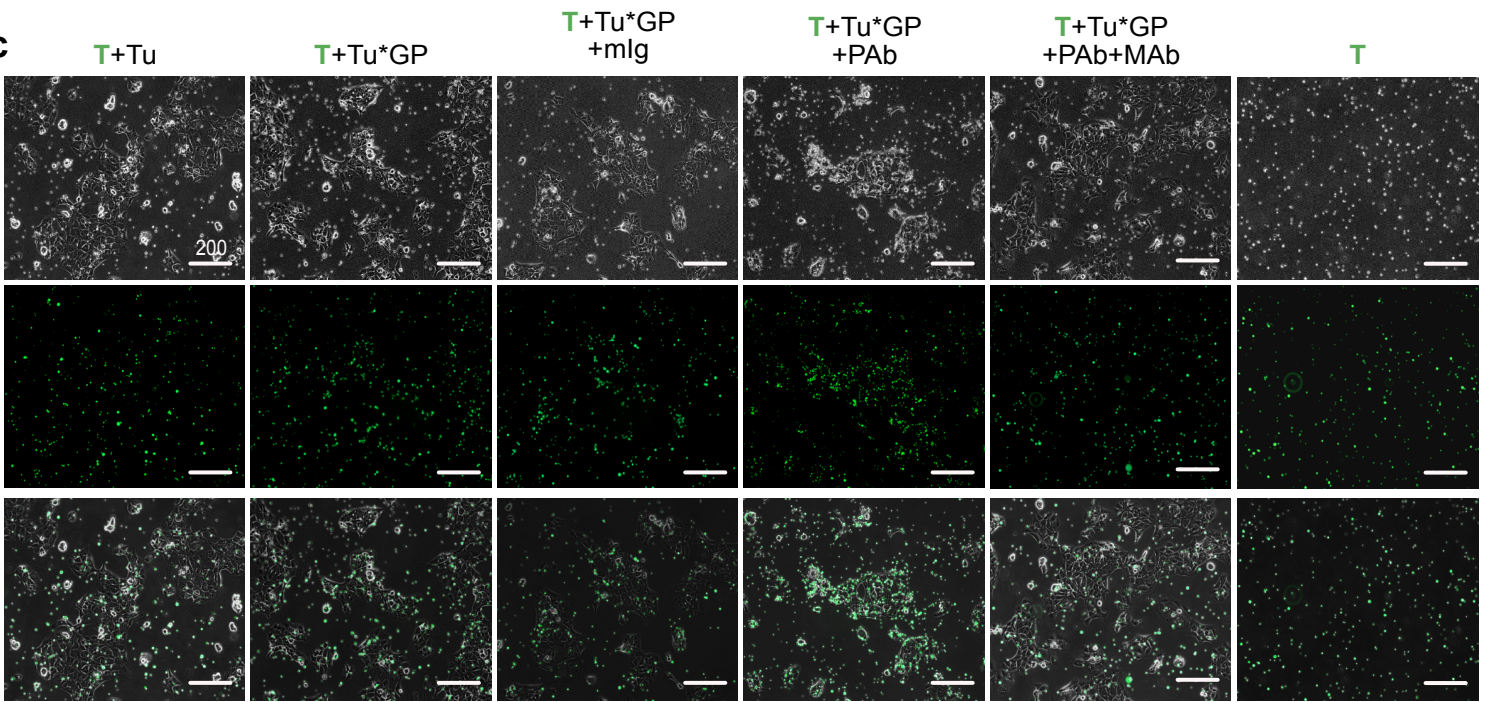

**d**

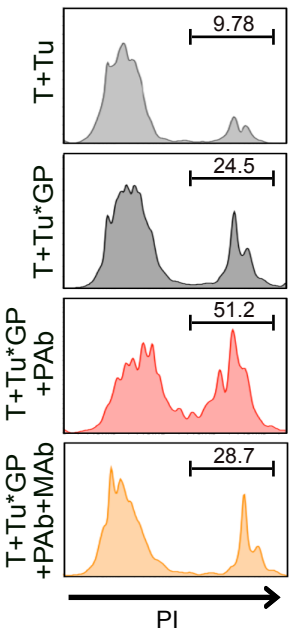

**e**

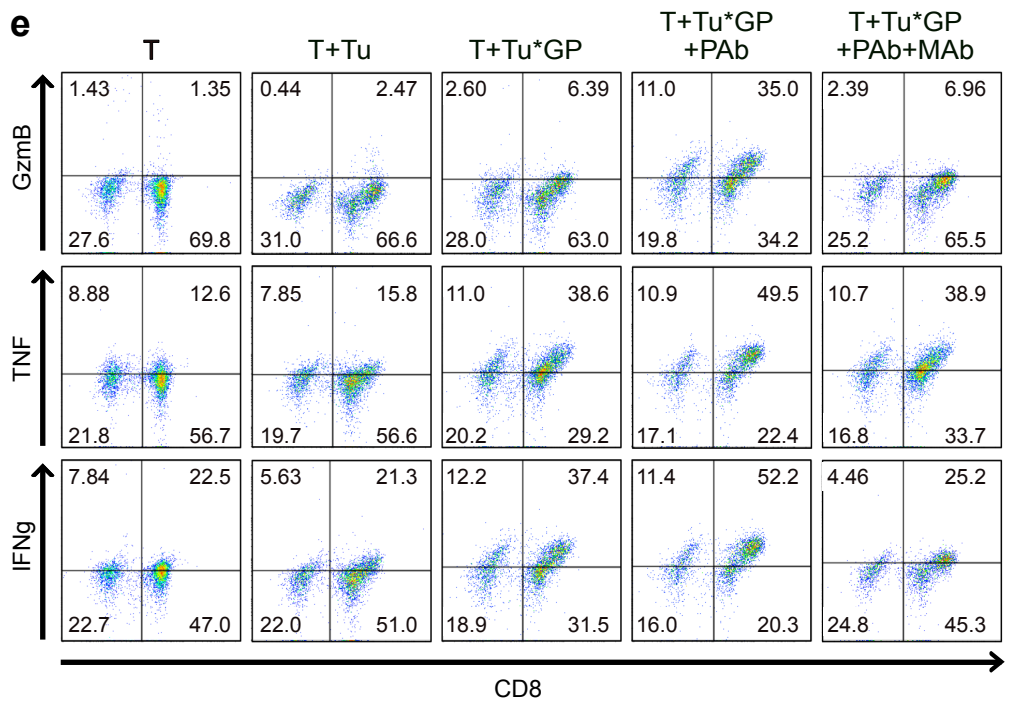

### Supplementary Figure 8

(a) Surface expression of MHC I marker H-2Kb on GP82 cells treated with or without PGRN Ab or mlg (100ug/ml) was assessed by flow cytometry (n=4 independent experiments). One-way ANOVA, Kruskal-Wallis test. Mean + SD is shown. (b) Phase-contrast images of GP82 cells cultured with different treatments for 2 days. (c) Phase-contrast, fluorescence, and overlay images of GP82 cells and LCMV-gp33-reactive T cells (CFSE-labeled, green) after 2 days of co-culture. When anti-MHCI (H-2Db) neutralizing antibody (MAb) was included in the treatment, MAb was added 1h after PGRN Ab treatment. T cells were then added 1h after MAb treatment. Tu: Tumor cells (GP82 cells); GP: LCMV-gp33-induced; PAb: PGRN antibody (100ug/ml); MAb: MHC I (H-2Db) neutralizing antibody (100ug/ml). (d) Representative histograms showing cytotoxicity level of GP82 cells with or without LCMV-gp33 expression, anti-PGRN antibody, and anti-MHCI neutralizing antibody, upon co-culture with LCMV-gp33-reactive T cells. Percentages of PI<sup>+</sup> cells are indicated. (e) Representative scatter plots showing the percentage of cells that are positive for both CD8 and cytotoxic markers granzyme B (GzmB), TNF, and IFNg.



# Supplementary Figure 9

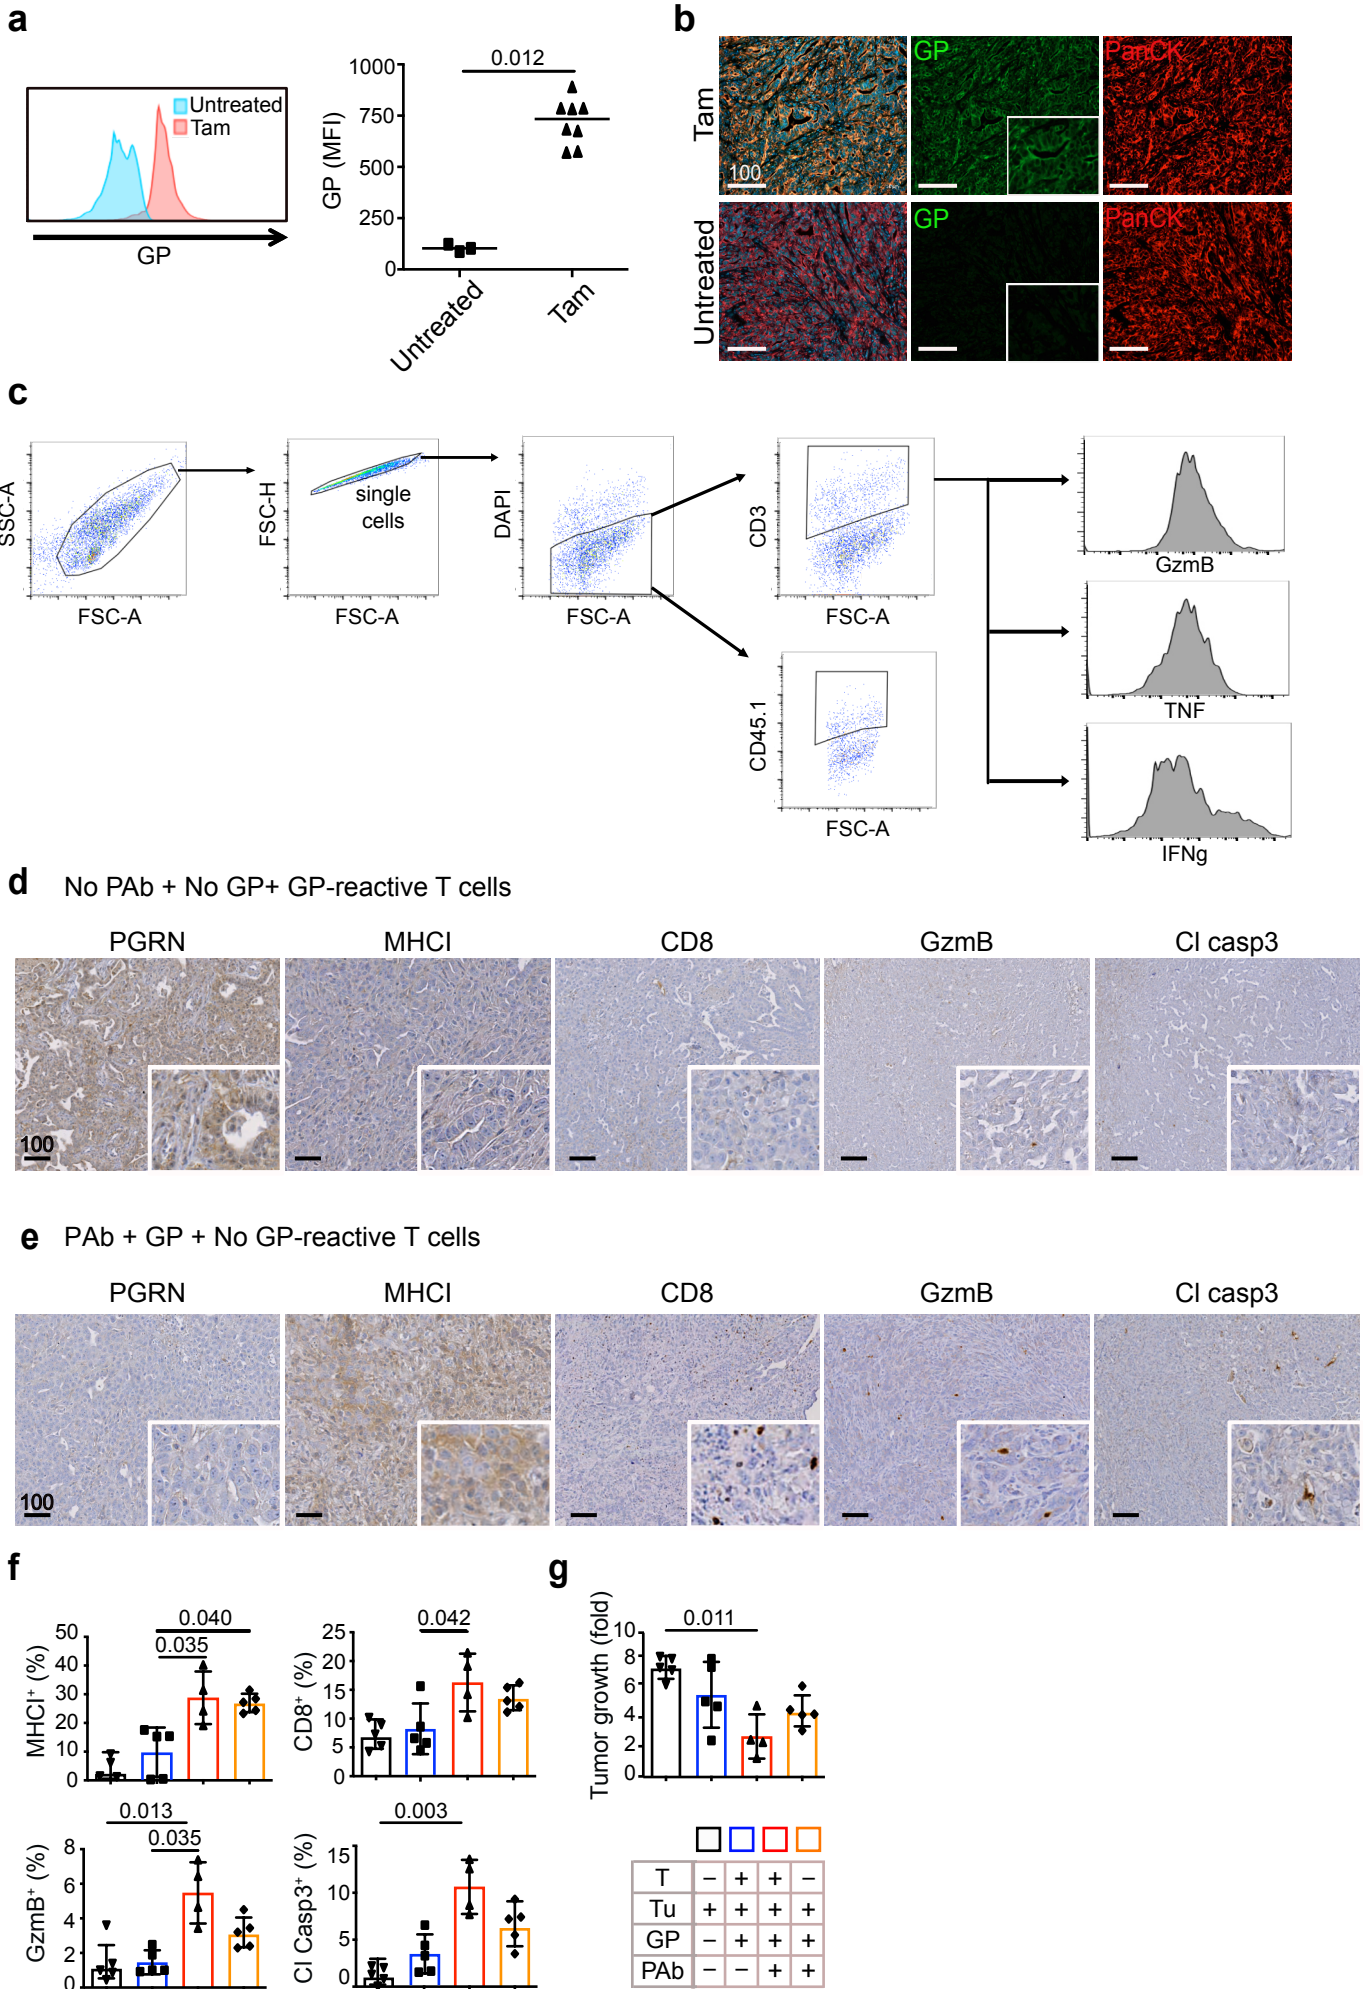

### Supplementary Figure 9

(a) Tumors dissected from GP82 orthotopic models that are treated with or without tamoxifen (Tam, 75mg/kg) were digested into disaggregated cells. Cells were stained for LCMV-gp33 (GP) expression and analyzed by flow cytometry. Untreated: n=3; Tam: n=8. Two-tailed Mann-Whitney test. MFI: Mean Fluorescent Intensity. (b) IF staining showing LCMV-gp33 (GP) expression in PanCK<sup>+</sup> tumor cells in GP82 orthotopic models that were treated with or without tamoxifen (Tam, 75mg/kg). (n=3 untreated or Tam-treated GP82 tumors). Representative images are shown. (c) Gating strategy for flow cytometric analysis on the T cell quantification and characterization in dissociated tumors. (d, e) IHC staining of PGRN, MHCI, CD8, GranzymB (GzmB), and cleaved casp3 (Cl casp3) in tumor (d) without tamoxifen and PGRN Ab treatment, but with LCMV-gp33-reactive T cell injection (n=3 animals); and (e) with tamoxifen and PGRN Ab treatment, but without LCMV-gp33-reactive T cell injection (n=4 animals). Representative images are shown. (f) Percentage of respective positive cells in the whole tumors quantified by Definiens. (g) Tumor growth was assessed by ultrasound imaging and presented as fold change in tumor volume before and after PGRN Ab or mIg treatment started. (f, g) Tumor only: n=5; Tumor with LCMV-gp33 (GP) and LCMV-gp33-reactive T cell: n=5; Tumor with LCMV-gp33 (GP) and LCMV-gp33-reactive T cell and PGRN antibody: n=4; Tumor with LCMV-gp33 (GP) and PGRN antibody: n=4. One-way ANOVA, Kruskal-Wallis test. Mean  $\pm$  SD is shown. Scale bar unit:  $\mu$ m

# Supplementary Figure 10

**a**

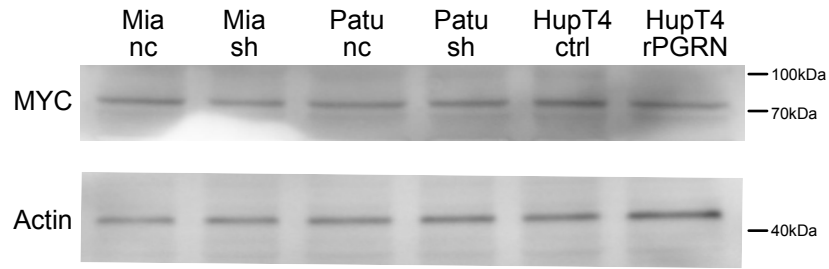

**b**

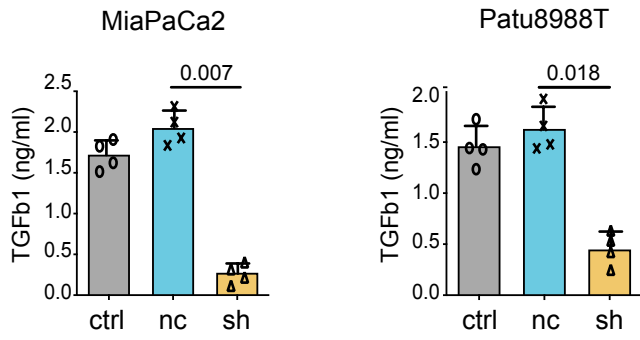

Supplementary Figure 10

(a) Western blot showing MYC and actin in MiaPaCa2 (Mia) and Patu8988T (Patu) cells with or without *GRN* suppression (nc: scramble control; sh: shGRN); or HupT4 cells treated with or without 0.4 ng/ml rPGRN for 24h. (n=3 independent experiments). Representative images are shown. (b) TGFb1 level in culture supernatants of control (nc) and shGRN transfectants of MiaPaCa2 and PatuT was measured by ELISA (n=4). One-way ANOVA, Kruskal-Wallis test. Mean + SD is shown.

# Supplementary Figure 11

**a**

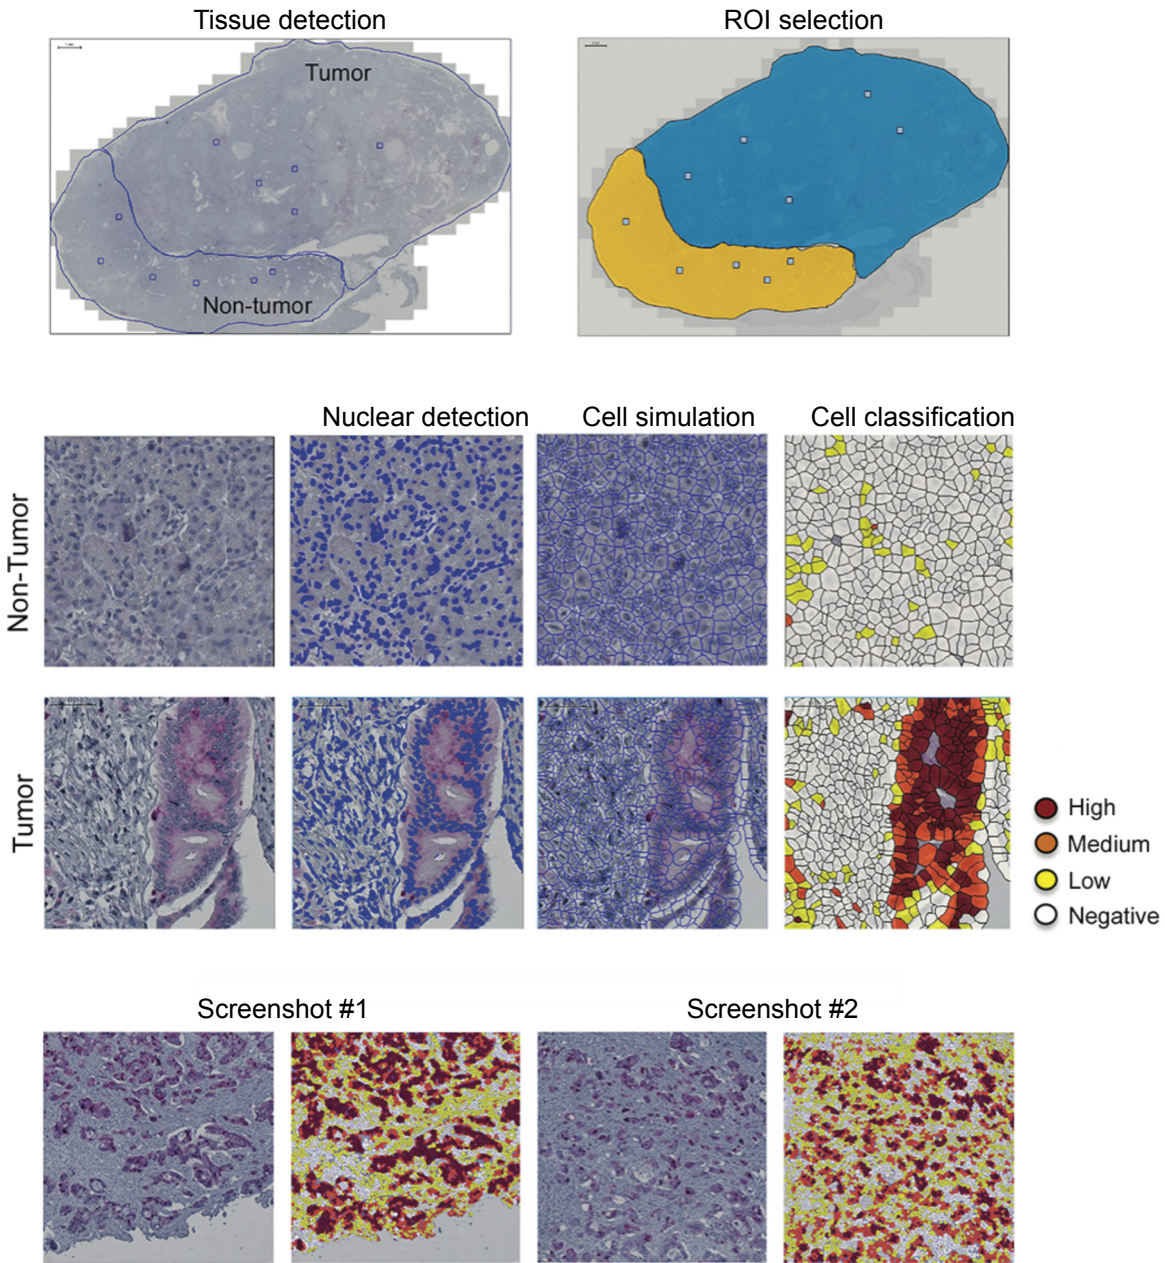

**b**

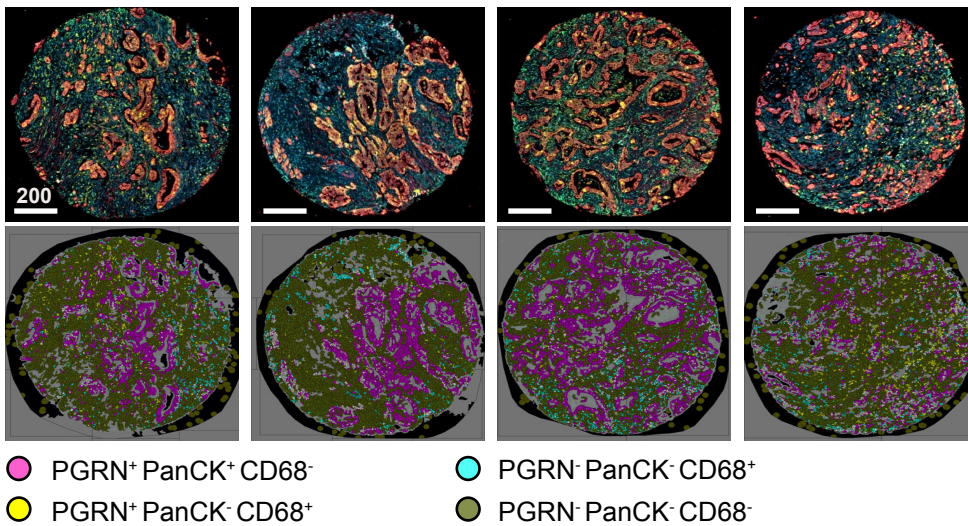

### Supplementary Figure 11

Quantification of IHC staining by Definiens. (a) Tumor and non-tumor pancreas tissue were defined. Regions of interest (ROIs) were selected for defining nucleus and cells, for accurate assessment of cell number of each slide. Cell classification was performed to categorized different signal intensity. Screenshot #1 and #2 as examples to illustrate the accuracy of the software. (n=54 for Essen cohort, n=31 for Nijmegen cohort). Representative images are shown. (b) Quantification of mIF staining in TMA. Examples showing quantification of cells co-expressing PGRN and/or PanCK and/or CD68. (n=71). Representative images are shown.

# Supplementary Figure 12

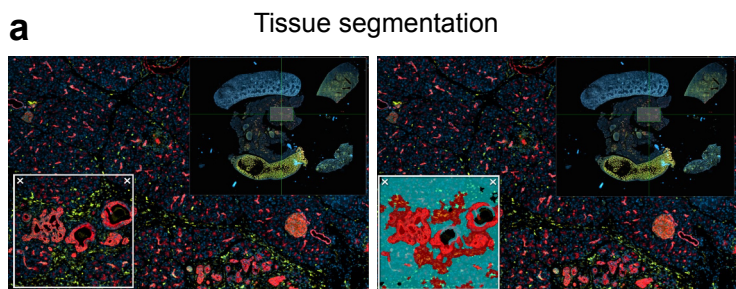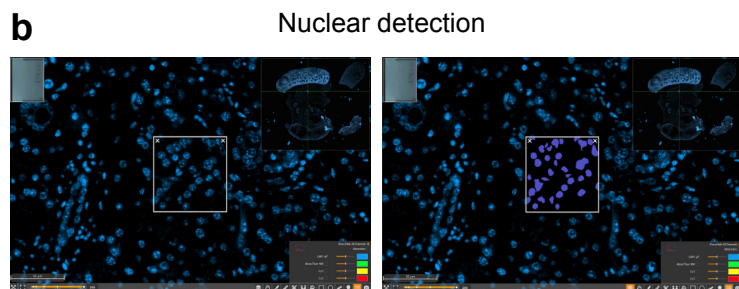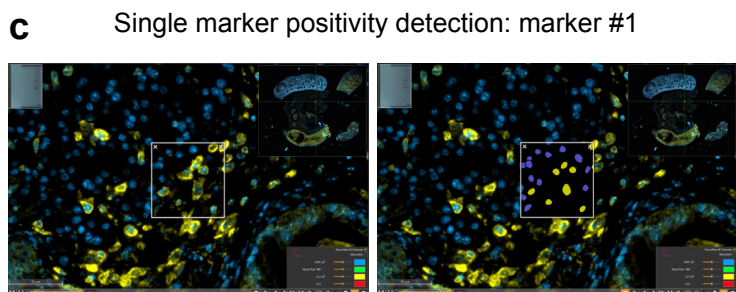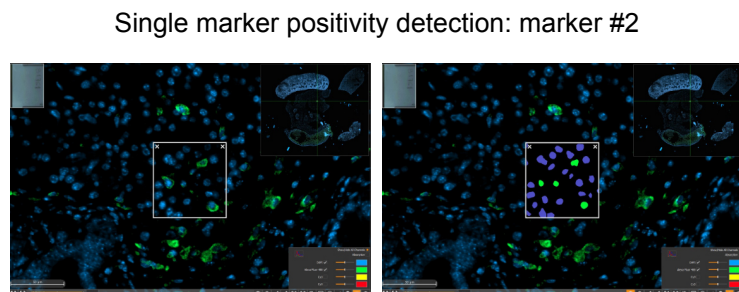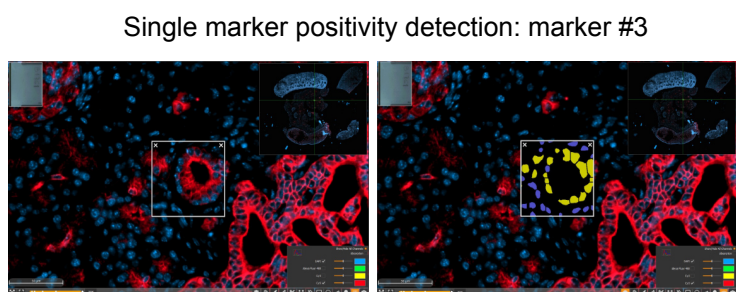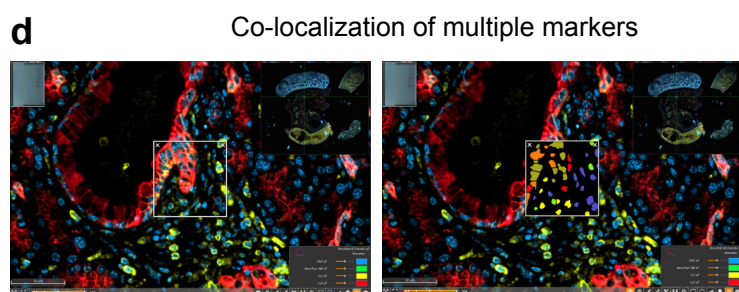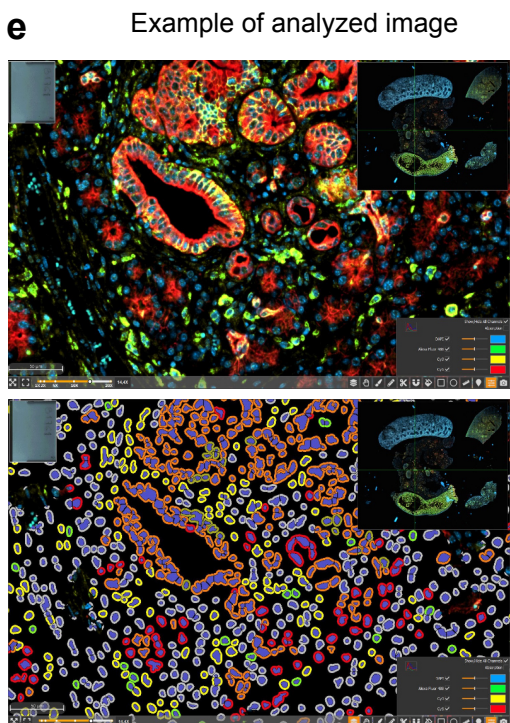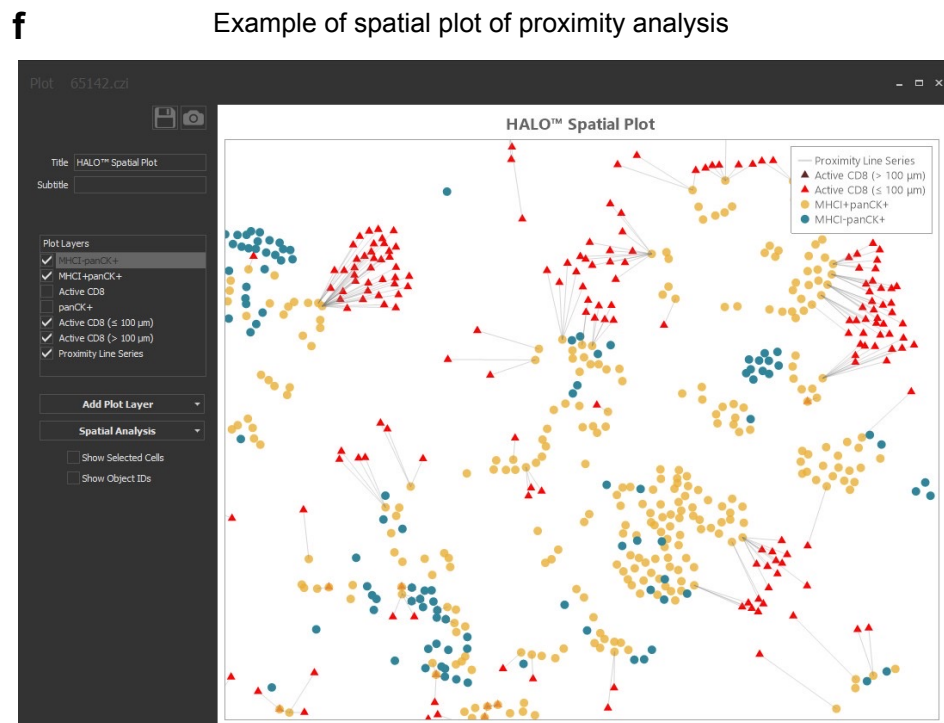

### Supplementary Figure 12

Quantification of mIF staining by HALO. (a) Tissue segmentation to define tumor (red), stroma (green), and empty space (black). (b) Nuclear detection to assess the cell number in each slide. (c) Definition of positivity of individual markers. (d) Co-localization of multiple markers. (e) Example of analyzed image as visualized by co-expression of multiple markers. (n=12 for untreated *CKP* tumors harvested at different developmental stages). Representative images are shown. (f) Example of spatial plot of proximity analysis demonstrating the target cells (CD8<sup>+</sup> GzmB<sup>+</sup>, Active CD8) within 100um of MHC1<sup>+</sup>panCK<sup>+</sup> cells.



## Supplementary Tables: S1-7

**Supplementary Table 1. Association of PGRN level with clinicopathological parameters and immune markers in CONKO-001 cohort**

|                          | PGRN_Lo | PGRN_Hi | <i>P</i> value |
|--------------------------|---------|---------|----------------|
| Tumor size_2 classes     |         |         |                |
| T1-2                     | 6       | 1       | <i>0.107</i>   |
| T3-4                     | 30      | 34      |                |
| Ki67                     |         |         |                |
| <50                      | 17      | 9       | <i>0.067</i>   |
| 50+                      | 16      | 22      |                |
| SMA_intensity            |         |         |                |
| Low                      | 2       | 7       | <i>0.247</i>   |
| High                     | 16      | 21      |                |
| P53 intensity            |         |         |                |
| 0-1                      | 13      | 9       | <i>0.292</i>   |
| 2-3                      | 19      | 23      |                |
| CD8 <sup>+</sup>         |         |         |                |
| <42                      | 9       | 16      | <i>0.037</i>   |
| 42+                      | 25      | 15      |                |
| Stromal CD8 <sup>+</sup> |         |         |                |
| ≤25                      | 8       | 12      | <i>0.185</i>   |
| 25+                      | 26      | 19      |                |
| CD103 <sup>+</sup>       |         |         |                |
| ≤3                       | 27      | 23      | <i>0.251</i>   |
| 3+                       | 6       | 10      |                |

**Supplementary Table 2. Association of PGRN level with KRAS mutational status in CONKO-001 cohort**

|                                       | PGRN_Lo | PGRN_Hi | <i>P</i> value |
|---------------------------------------|---------|---------|----------------|
| PGRN (PanCK <sup>+</sup> Tumor cells) |         |         |                |
| Wild-type                             | 5       | 5       | 0.426          |
| Mutated                               | 13      | 23      |                |
| PGRN (CD68 <sup>+</sup> Macrophages)  |         |         |                |
| Wild-type                             | 5       | 5       | 0.876          |
| Mutated                               | 19      | 17      |                |
| PGRN (Total)                          |         |         |                |
| Wild-type                             | 5       | 5       | 0.638          |
| Mutated                               | 15      | 21      |                |

**Supplementary Table 3. IHC antibodies**

| Antigen       | Clone        | Manufacturer       | Dilution                  | Reactivity      |
|---------------|--------------|--------------------|---------------------------|-----------------|
| PGRN          | A23          | Ref <sup>1</sup>   | 1:200                     | Human,<br>Mouse |
| PanCK         | PCK-26       | Abcam              | 1:100                     | Human,<br>Mouse |
| Ki67          | Polyclonal   | Abcam              | 1:200                     | Mouse           |
| F4/80         | BM8          | BMA<br>biomedicals | 1:200                     | Mouse           |
| MRC1          | Polyclonal   | Abcam              | 1:200                     | Mouse           |
| INOS          | Polyclonal   | Abcam              | 1:200                     | Mouse           |
| Phospho-STAT1 | M135         | Abcam              | 1:100                     | Mouse           |
| Foxp3         | FJK-16s      | ThermoFisher       | 1:50                      | Mouse           |
| Cl. caspase 3 | 5A1E         | Cell Signaling     | 1:100                     | Mouse           |
| MHC I (H-2Db) | AF6-88.5.5.3 | ThermoFisher       | 1:100                     | Mouse           |
| MHC II        | M5/114.15.2  | ThermoFisher       | 1:100                     | Mouse           |
| MHCI (HLA-A)  | C-6          | Santa Cruz         | 1:100                     | Human           |
| CD3           | Polyclonal   | Abcam              | 1:100                     | Mouse           |
| CD4           | RM4-5        | BD                 | 1:50                      |                 |
| CD8           | SP16         | Abcam              | 1:100                     | Human           |
| CD8           | EPR20305     | Abcam              | 1:100                     | Mouse           |
| T-bet         | 4B10         | eBioscience        | 1:50                      | Mouse           |
| Eomes         | Dan11mag     | eBioscience        | 1:50                      | Mouse           |
| Granzyme B    | Polyclonal   | Abcam              | 1:500 (hu),<br>1:100 (ms) | Human,<br>Mouse |
| $\alpha$ -sma | Polyclonal   | Abcam              | 1:100                     | Mouse           |
| Lamp1         | Polyclonal   | Abcam              | 1:200                     | Mouse           |
| LC3B          | Polyclonal   | Abcam              | 1:100                     | Mouse           |
| CD68          | KP1          | Abcam              | 1:400                     | Human           |

**Supplementary Table 4. Sequential multiplexed immunofluorescence staining protocol**

| Antigen      | Primary antibody |                  |          | TSA fluorophore |          |
|--------------|------------------|------------------|----------|-----------------|----------|
|              | Clone            | Manufacturer     | Dilution | Fluorophore     | Dilution |
| Fig. 1, 4    |                  |                  |          |                 |          |
| CD68         | KP1              | Abcam            | 1:400    | Opal520         | 1:200    |
| PGRN         | A23              | Ref <sup>1</sup> | 1:200    | Opal570         | 1:200    |
| PanCK        | PCK-26           | Abcam            | 1:100    | Opal780         | 1:100    |
| Fig. 2       |                  |                  |          |                 |          |
| PGRN         | A23              | Ref <sup>1</sup> | 1:200    | Opal570         | 1:200    |
| CD8          | SP16             | Abcam            | 1:100    | Opal480         | 1:200    |
| GzmB         | Polyclonal       | Abcam            | 1:500    | Opal690         | 1:200    |
| MHCI (HLA-A) | C-6              | Santa Cruz       | 1:100    | Opal520         | 1:200    |
| PanCK        | PCK-26           | Abcam            | 1:100    | Opal780         | 1:100    |
| Fig. 5       |                  |                  |          |                 |          |
| CD8          | SP16             | Abcam            | 1:100    | Opal650         | 1:200    |
| GzmB         | Polyclonal       | Abcam            | 1:500    | Opal520         | 1:200    |
| T-bet        | 4B10             | eBioscience      | 1:50     | Opal570         | 1:200    |
| Fig. 6       |                  |                  |          |                 |          |
| PGRN         | A23              | Ref <sup>1</sup> | 1:200    | Opal570         | 1:200    |
| CD8          | EPR20305         | Abcam            | 1:100    | Opal480         | 1:200    |
| MHCI (H2Db)  | AF6-88.5.5.3     | Thermofisher     | 1:100    | Opal690         | 1:200    |
| PanCK        | PCK-26           | Abcam            | 1:100    | Opal780         | 1:100    |
| Fig. S5      |                  |                  |          |                 |          |
| PDPN         | Polyclonal       | Abcam            | 1:250    | Opal520         | 1:200    |
| Ly6C         | ER-MP20          | Abcam            | 1:100    | Opal620         | 1:200    |

**Supplementary Table 5a. List of mouse strains**

| Gene                                                    | Genetic                                   | Strain                                                      | References  |
|---------------------------------------------------------|-------------------------------------------|-------------------------------------------------------------|-------------|
| <i>Kras<sup>fl</sup></i>                                | <i>LSL-KrasG12D</i><br>knock-in           | <i>Kras<sup>tm4Tyj</sup></i>                                | 2           |
| <i>Ptf1a<sup>Cre</sup></i>                              | <i>Cre</i> knock-in                       | <i>Ptf1a<sup>tm1(cre)Hnak</sup></i>                         | 3           |
| <i>Trp53<sup>fl</sup></i>                               | <i>LoxP</i> -sites knock-in               | <i>Trp53<sup>tm1Brn</sup></i>                               | 4           |
| <i>Kras<sup>frt</sup></i>                               | <i>FSF-KrasG12D</i><br>knock-in           | <i>Kras<sup>tm1Dsa</sup></i>                                | 5           |
| <i>Ptf1a<sup>Flp</sup></i>                              | <i>Flp</i> knock-in                       | <i>Ptf1a<sup>tm(flfp)</sup></i>                             | unpublished |
| <i>Trp53<sup>frt</sup></i>                              | <i>frt</i> -sites knock-in                | <i>Trp53<sup>tm1.1Dgk</sup></i>                             | 6           |
| <i>Rosa26</i><br>locus<br>( <i>Cre<sup>ERT2</sup></i> ) | <i>FSF-Cre<sup>ERT2</sup></i><br>knock-in | <i>Gt(ROSA)26Sor<sup>tm3(CAG-Cre/ERT2)Das</sup></i>         | 5           |
| <i>Rosa26</i><br>locus ( <i>GF1</i> )                   | <i>LSL-GP</i> knock-in                    | <i>Gt(ROSA)26Sor<sup>tmloxP-STOP-loxP-GP-IRES-YFP</sup></i> | 7           |
| unknown<br>locus                                        | <i>TCR</i> transgene                      | <i>Tg(TcrLCMV)<sup>327Sdz</sup></i>                         | 8           |

**Supplementary Table 5b. Interbred mouse strains and description.**

| Strains intercrossed                                                                                                                                                                                                                | Strain (abbreviated) | Action                                                                                                                                                                                                              | Genotype                                                                                                                                          |
|-------------------------------------------------------------------------------------------------------------------------------------------------------------------------------------------------------------------------------------|----------------------|---------------------------------------------------------------------------------------------------------------------------------------------------------------------------------------------------------------------|---------------------------------------------------------------------------------------------------------------------------------------------------|
| <i>Ptf1a</i> <sup>tm1(cre)Hnak</sup><br><i>Kras</i> <sup>Tm4Tyj</sup><br><i>Trp53</i> <sup>tm1Bm</sup>                                                                                                                              | CKP                  | Induction of spontaneous PDAC through CRE-induced pancreas-specific activation of mutant KRAS <sup>G12D</sup> and homozygous loss of Tp53                                                                           | <i>Ptf1a</i> <sup>wt/Cre</sup> ; <i>Kras</i> <sup>wt/LSL-G12D</sup> ; <i>p53</i> <sup>fl/fl</sup>                                                 |
| <i>Kras</i> <sup>tm1Dsa</sup><br><i>Ptf1a</i> <sup>tm(flip)</sup><br><i>Trp53</i> <sup>tm1.1Dgk</sup><br><u><i>Gt(ROSA)26Sor</i><br/><i>tm3(CAG-Cre/ERT2)Das</i></u><br><i>Gt(ROSA)26Sor</i><br><i>tmloxP-STOP-loxP-GP-IRES-YFP</i> | FKPC2GP              | Induction of spontaneous PDAC through Flp-induced pancreas-specific activation of mutant KRAS <sup>G12D</sup> and homozygous loss of Tp53. Tamoxifen-inducible pancreas-specific expression of YFP and glycoprotein | <i>Ptf1a</i> <sup>wt/Flp</sup> ; <i>Kras</i> <sup>wt/FSF-G12D</sup> ; <i>p53</i> <sup>frt/frt</sup> ; <i>ROSA26</i> <sup>FSF-CreERT2/LSL-GP</sup> |

**Supplementary Table 6. FACS antibodies**

| Antigen       | Conjugate       | Clone       | Manufacturer     | Isotype                | Amount/test or dilution |
|---------------|-----------------|-------------|------------------|------------------------|-------------------------|
| PGRN          | Unconjugated    | A23         | Ref <sup>1</sup> | Mouse IgG1k            | 1ug                     |
| HLA-A/B/C     | FITC            | W6/32       | Biolegend        | Mouse IgG2a            | 1:20                    |
| HLA-DR        | FITC            | L243        | Biolegend        | Mouse IgG2a            | 2ug                     |
| LCMV-gp33     | FITC            | --          | In house         | --                     | 1:100                   |
| H2Db          | FITC            | KH95        | Biolegend        | Mouse IgG2b            | 1ug                     |
| CD3           | APC             | 145-2C11    | BD               | Armenian Hamster IgG1k | 1:50                    |
| CD45.1        | FITC            | A20         | Thermofisher     | Mouse IgG2a            | 0.5ug                   |
| CD8           | eFluor450       | 53-6.7      | ebiosciences     | Rat Ig2a               | 0.25                    |
| GzmB          | Alexa Fluor 647 | GB11        | Biolegend        | Mouse IgG1k            | 1:100                   |
| TNF           | PE              | MP6-XT22    | Thermofisher     | Rat IgG1k              | 1:100                   |
| IFNg          | PE              | XMG1.2      | Thermofisher     | Rat IgG1k              | 0.25                    |
| EpCAM         | APC             | G8.8        | Thermofisher     | Rat IgG2ak             | 0.125                   |
| $\alpha$ -sma | Unconjugated    | 1A4         | Thermofisher     | Mouse IgG2a            | 0.5                     |
| Podoplanin    | Alexa Fluor488  | 8.1.1       | Biolegend        | Syrian Hamster IgG     | 0.25                    |
| Ly6C          | APC             | HK1.4       | Biolegend        | Rat IgG2ck             | 0.25                    |
| MHCII         | Unconjugated    | M5/114/15/2 | Thermofisher     | Rat IgG2bk             | 0.125                   |
| PDGFR1        | PE              | APA5        | Biolegend        | Rat IgG2ak             | 0.25                    |

**Supplementary Table 7. Immunofluorescence staining and antibodies**

| Primary antibodies | Clone        | Manufacturer   | Dil.  | Secondary antibodies           | Manufacturer | Dil.  |
|--------------------|--------------|----------------|-------|--------------------------------|--------------|-------|
| LC3B               | Poly         | Abcam          | 1:500 | Dylight594-Goat anti-rabbit    | Thermofisher | 1:500 |
| HLA-A/B/C          | W6/32        | Biologend      | 1:150 | Alexa Fluor488-Goat anti-mouse | Thermofisher | 1:500 |
| H2Db               | AF6-88.5.5.3 | ThermoFisher   | 1:150 | Alexa Fluor488-Goat anti-mouse | Thermofisher | 1:500 |
| Rab7               | D95F2        | Cell signaling | 1:100 | Dylight594-Goat anti-rabbit    | Thermofisher | 1:500 |
| Lamp1              | H4A3         | Abcam          | 1:200 | Alexa Fluor488-Goat anti-mouse | Thermofisher | 1:500 |



## Reference

1. Ho JC, Ip YC, Cheung ST, Lee YT, Chan KF, Wong SY, Fan ST: Granulin-epithelin precursor as a therapeutic target for hepatocellular carcinoma. *Hepatology* 2008, 47(5):1524-1532.
2. Jackson EL, Willis N, Mercer K, Bronson RT, Crowley D, Montoya R, Jacks T, Tuveson DA: Analysis of lung tumor initiation and progression using conditional expression of oncogenic K-ras. *Genes & development* 2001, 15(24):3243-3248.
3. Nakhai H, Sel S, Favor J, Mendoza-Torres L, Paulsen F, Duncker GI, Schmid RM: Ptf1a is essential for the differentiation of GABAergic and glycinergic amacrine cells and horizontal cells in the mouse retina. *Development* 2007, 134(6):1151-1160.
4. Marino S, Vooijs M, van Der Gulden H, Jonkers J, Berns A: Induction of medulloblastomas in p53-null mutant mice by somatic inactivation of Rb in the external granular layer cells of the cerebellum. *Genes & development* 2000, 14(8):994-1004.
5. Schonhuber N, Seidler B, Schuck K, Veltkamp C, Schachtler C, Zukowska M, Eser S, Feyerabend TB, Paul MC, Eser P *et al*: A next-generation dual-recombinase system for time- and host-specific targeting of pancreatic cancer. *Nature medicine* 2014, 20(11):1340-1347.
6. Lee CL, Moding EJ, Cuneo KC, Li Y, Sullivan JM, Mao L, Washington I, Jeffords LB, Rodrigues RC, Ma Y *et al*: p53 functions in endothelial cells to prevent radiation-induced myocardial injury in mice. *Sci Signal* 2012, 5(234):ra52.
7. Page N, Klimek B, De Roo M, Steinbach K, Soldati H, Lemeille S, Wagner I, Kreutzfeldt M, Di Liberto G, Vincenti I *et al*: Expression of the DNA-Binding Factor TOX Promotes the Encephalitogenic Potential of Microbe-Induced Autoreactive CD8(+) T Cells. *Immunity* 2018, 48(5):937-950 e938.
8. Pircher H, Burki K, Lang R, Hengartner H, Zinkernagel RM: Tolerance induction in double specific T-cell receptor transgenic mice varies with antigen. *Nature* 1989, 342(6249):559-561.
