# Supplementary material for: Progranulin mediates immune evasion of pancreatic ductal adenocarcinoma through regulation of MHCI expression
Source: PubMed Central journal article supplement (PMC8748938; doi:10.1038/s41467-021-27088-9), 2022-01-10
Supplement: 41467_2021_27088_MOESM3_ESM.pdf [file 41467_2021_27088_MOESM3_ESM.pdf]

### **Description of Additional Supplementary Files**

File Name: Supplementary Data 1

Description: Stromal cell type estimation in Maurer et al dataset (GSE93326)

File Name: Supplementary Data 2

Description: Geneset enrichment analysis in Maurer et al dataset (GSE93326)

File Name: Supplementary Data 3

Description: Differentially expressed gene analysis in Maurer et al dataset (GSE93326)
